# Supplementary material for: Spatially explicit models of density improve estimates of Eastern Bering Sea beluga (Delphinapterus leucas) abundance and distribution from line-transect surveys
Source: PeerJ journal article supplement (doi:10.7717/peerj.20077), 2025-09-30

Supplement 6  
DSM Overview and Evaluation  
for the  
Eastern Bering Sea Beluga  
Case Study

Table S6.1. Key aspects of all 2017 Eastern Bering Sea beluga density surface models constructed and evaluated. Blue highlighting indicates models included in the ensemble.

| Year | Spatial Formulation       | Number of Observations | Number of Transect Segments | Number of Prediction Cells | Number of Nodes | max.edge Inside (Outside) | Cutoff       | Inner Boundary                                                       | Outer Boundary                                                                                    | Smoothing Spline Variables           | number unsampled cells with extreme predicted abundance |
|------|---------------------------|------------------------|-----------------------------|----------------------------|-----------------|---------------------------|--------------|----------------------------------------------------------------------|---------------------------------------------------------------------------------------------------|--------------------------------------|---------------------------------------------------------|
| 2017 | SPDE Matérn               | 598                    | 604                         | 342                        | 595             | 25 (50)                   | 0.2*max.edge | non-convex hull around all segment midpoints, plus a buffer of 25 km | offset from the inner boundary by a distance equal to 1/3 the latitudinal range of the study area | NA                                   | 0                                                       |
| 2017 | SPDE Matérn               | 598                    | 604                         | 342                        | 564             | 25 (50)                   | 0.2*max.edge | non-convex hull around all segment midpoints                         | offset from the inner boundary by a distance equal to 35% of the inner boundary diameter          | NA                                   | 0                                                       |
| 2017 | SPDE Matérn               | 598                    | 604                         | 342                        | 528             | 25 (50)                   | 0.2*max.edge | non-convex hull around all segment midpoints                         | offset from the inner boundary by a distance equal to 20% of the inner boundary diameter          | NA                                   | 0                                                       |
| 2017 | SPDE Matérn               | 598                    | 604                         | 342                        | 289             | 50 (100)                  | 0.2*max.edge | non-convex hull around all segment midpoints                         | offset from the inner boundary by a distance equal to 35% of the inner boundary diameter          | NA                                   | 0                                                       |
| 2017 | SPDE Matérn               | 598                    | 604                         | 342                        | 160             | 75 (150)                  | 0.2*max.edge | non-convex hull around all segment midpoints                         | offset from the inner boundary by a distance equal to 35% of the inner boundary diameter          | NA                                   | 0                                                       |
| 2017 | SPDE Matérn               | 598                    | 604                         | 342                        | 199             | 60 (120)                  | 0.2*max.edge | non-convex hull around all segment midpoints                         | offset from the inner boundary by a distance equal to 35% of the inner boundary diameter          | NA                                   | 0                                                       |
| 2017 | SPDE Matérn with barriers | 598                    | 604                         | 342                        | 660             | 25 (50)                   | 0.2*max.edge | coastline and study area boundaries                                  | NA                                                                                                | NA                                   | 0                                                       |
| 2017 | SPDE Matérn with barriers | 598                    | 604                         | 342                        | 292             | 50 (100)                  | 0.2*max.edge | coastline and study area boundaries                                  | NA                                                                                                | NA                                   | 0                                                       |
| 2017 | SPDE Matérn with barriers | 598                    | 604                         | 342                        | 175             | 75 (150)                  | 0.2*max.edge | coastline and study area boundaries                                  | NA                                                                                                | NA                                   | 0                                                       |
| 2017 | SPDE Matérn with barriers | 598                    | 604                         | 342                        | 214             | 60 (120)                  | 0.2*max.edge | coastline and study area boundaries                                  | NA                                                                                                | NA                                   | 0                                                       |
| 2017 | Soap film smoother        | 598                    | 604                         | 342                        | NA              | NA                        | NA           | NA                                                                   | NA                                                                                                | s(easting, northing, bs="so", k=150) | 0                                                       |
| 2017 | Tensor product smoother   | 598                    | 604                         | 342                        | NA              | NA                        | NA           | NA                                                                   | NA                                                                                                | te(easting, northing, bs="ts", k=14) | 0                                                       |
| 2017 | Bivariate isotropic tprs  | 598                    | 604                         | 342                        | NA              | NA                        | NA           | NA                                                                   | NA                                                                                                | s(easting, northing, bs="ts", k=200) | 0                                                       |

Table S6.2. Key aspects of all 2022 Eastern Bering Sea beluga density surface models constructed and evaluated. Blue highlighting indicates models included in the ensemble.

| Year | Spatial Formulation        | Number of Observations | Number of Transect Segments | Number of Prediction Cells | Number of Nodes | max.edge (Outside) | Cutoff       | Inner Boundary                                             | Outer Boundary                                                                           | Smoothing Spline Variables            | number unsampled cells with extreme predicted abundance |
|------|----------------------------|------------------------|-----------------------------|----------------------------|-----------------|--------------------|--------------|------------------------------------------------------------|------------------------------------------------------------------------------------------|---------------------------------------|---------------------------------------------------------|
| 2022 | SPDE: Matérn               | 241                    | 317                         | 554                        | 831             | 25 (50)            | 0.2*max.edge | non-convex hull around all segment midpoints               | offset from the inner boundary by a distance equal to 35% of the inner boundary diameter | NA                                    | 0                                                       |
| 2022 | SPDE: Matérn               | 241                    | 317                         | 554                        | 257             | 75 (150)           | 0.2*max.edge | non-convex hull around all segment midpoints               | offset from the inner boundary by a distance equal to 35% of the inner boundary diameter | NA                                    | 0                                                       |
| 2022 | SPDE: Matérn               | 241                    | 317                         | 554                        | 351             | 50 (100)           | 0.2*max.edge | non-convex hull around all segment midpoints               | offset from the inner boundary by a distance equal to 35% of the inner boundary diameter | NA                                    | 0                                                       |
| 2022 | SPDE: Matérn               | 241                    | 317                         | 554                        | 308             | 60 (120)           | 0.2*max.edge | non-convex hull around all segment midpoints               | offset from the inner boundary by a distance equal to 35% of the inner boundary diameter | NA                                    | 0                                                       |
| 2022 | SPDE: Matérn               | 241                    | 317                         | 554                        | 326             | 55 (110)           | 0.2*max.edge | non-convex hull around all segment midpoints               | offset from the inner boundary by a distance equal to 35% of the inner boundary diameter | NA                                    | 0                                                       |
| 2022 | SPDE: Matérn               | 241                    | 317                         | 550                        | 308             | 60 (120)           | 0.2*max.edge | non-convex hull around all segment midpoints; omit Scammon | offset from the inner boundary by a distance equal to 35% of the inner boundary diameter | NA                                    | 0                                                       |
| 2022 | SPDE: Matérn with barriers | 241                    | 317                         | 550                        | 953             | 25 (50)            | 0.2*max.edge | coastline and study area boundaries; omit Scammon          | NA                                                                                       | NA                                    | 0                                                       |
| 2022 | SPDE: Matérn with barriers | 241                    | 317                         | 550                        | 350             | 55 (110)           | 0.2*max.edge | coastline and study area boundaries; omit Scammon          | NA                                                                                       | NA                                    | 0                                                       |
| 2022 | SPDE: Matérn with barriers | 241                    | 317                         | 550                        | 316             | 60 (120)           | 0.2*max.edge | coastline and study area boundaries; omit Scammon          | NA                                                                                       | NA                                    | 0                                                       |
| 2022 | SPDE: Matérn with barriers | 241                    | 317                         | 550                        | 258             | 75 (150)           | 0.2*max.edge | coastline and study area boundaries; omit Scammon          | NA                                                                                       | NA                                    | 0                                                       |
| 2022 | SPDE: Matérn with barriers | 241                    | 317                         | 550                        | 782             | 30 (60)            | 0.2*max.edge | coastline and study area boundaries; omit Scammon          | NA                                                                                       | NA                                    | 1                                                       |
| 2022 | SPDE: Matérn with barriers | 241                    | 317                         | 550                        | 616             | 40 (80)            | 0.2*max.edge | coastline and study area boundaries; omit Scammon          | NA                                                                                       | NA                                    | 1                                                       |
| 2022 | SPDE: Matérn with barriers | 241                    | 317                         | 550                        | 702             | 35 (70)            | 0.2*max.edge | coastline and study area boundaries; omit Scammon          | NA                                                                                       | NA                                    | 1                                                       |
| 2022 | SPDE: Matérn with barriers | 241                    | 317                         | 550                        | 387             | 50 (100)           | 0.2*max.edge | coastline and study area boundaries; omit Scammon          | NA                                                                                       | NA                                    | 0                                                       |
| 2022 | Sap film smoother          | 241                    | 317                         | 554                        | NA              | NA                 | NA           | NA                                                         | NA                                                                                       | s(casting, northing, bs="50", k=222)  | 0                                                       |
| 2022 | Tensor product smoother    | 241                    | 317                         | 554                        | NA              | NA                 | NA           | NA                                                         | NA                                                                                       | te(casting, northing, bs="bc", k=16)  | 0                                                       |
| 2022 | Bivariate isotropic gps    | 241                    | 317                         | 554                        | NA              | NA                 | NA           | NA                                                         | NA                                                                                       | te(casting, northing, bs="70", k=309) | 0                                                       |

2017 candidate models in  
ensemble

# 2017 TMB SPDE mesh6 (max.edge = 60 km)

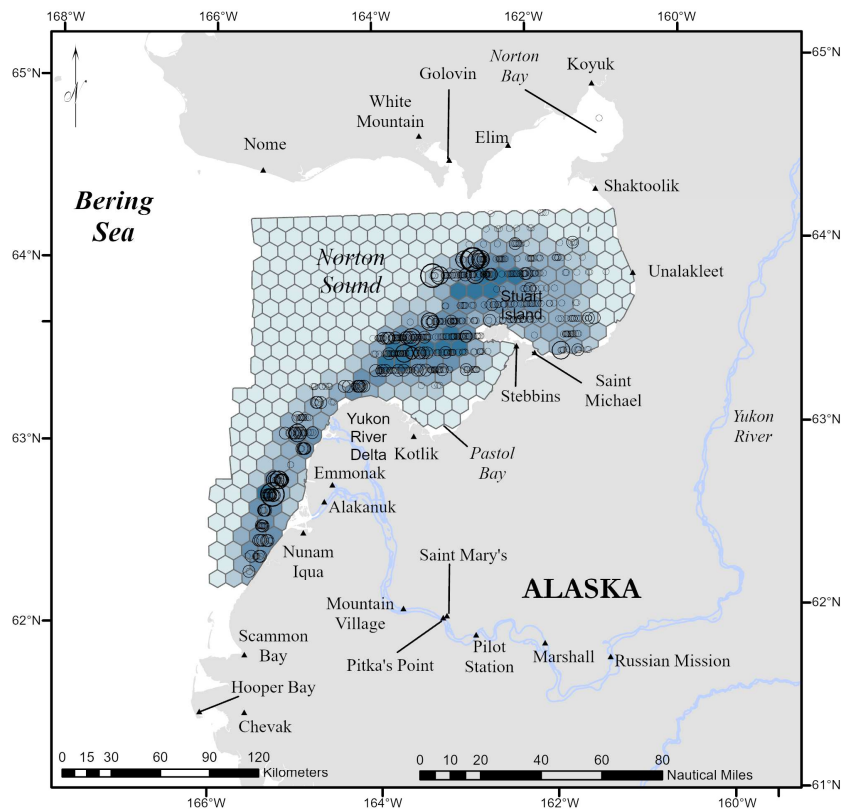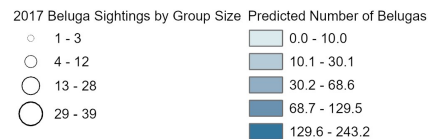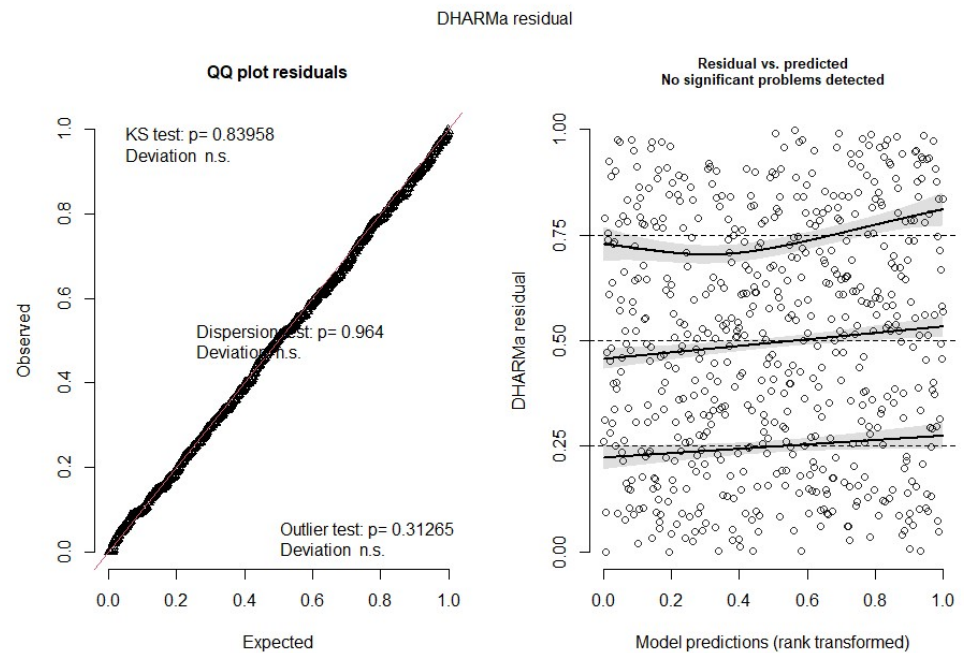

# 2017 TMB SPDE mesh6 Variance/Mean

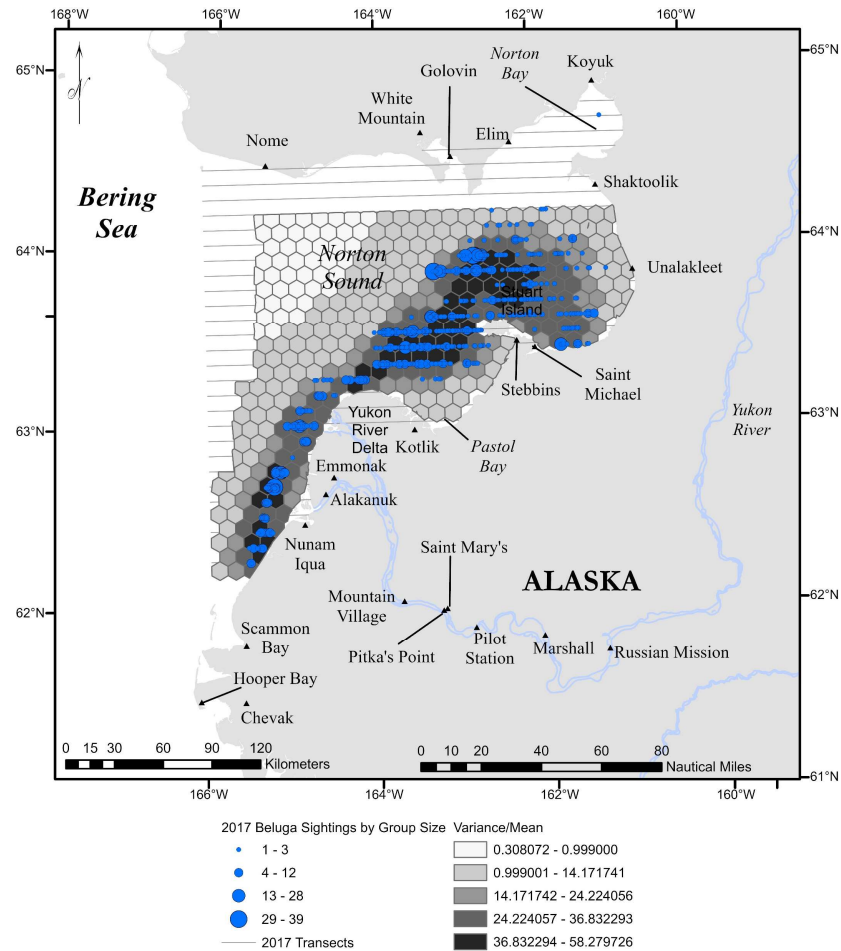

# 2017 TMB soap(easting,northing)

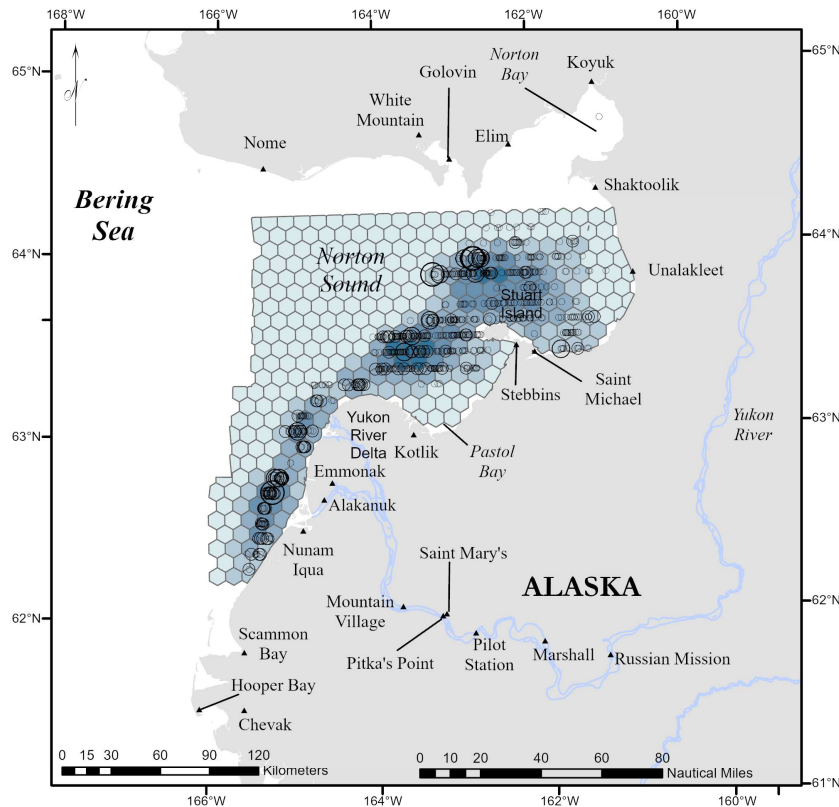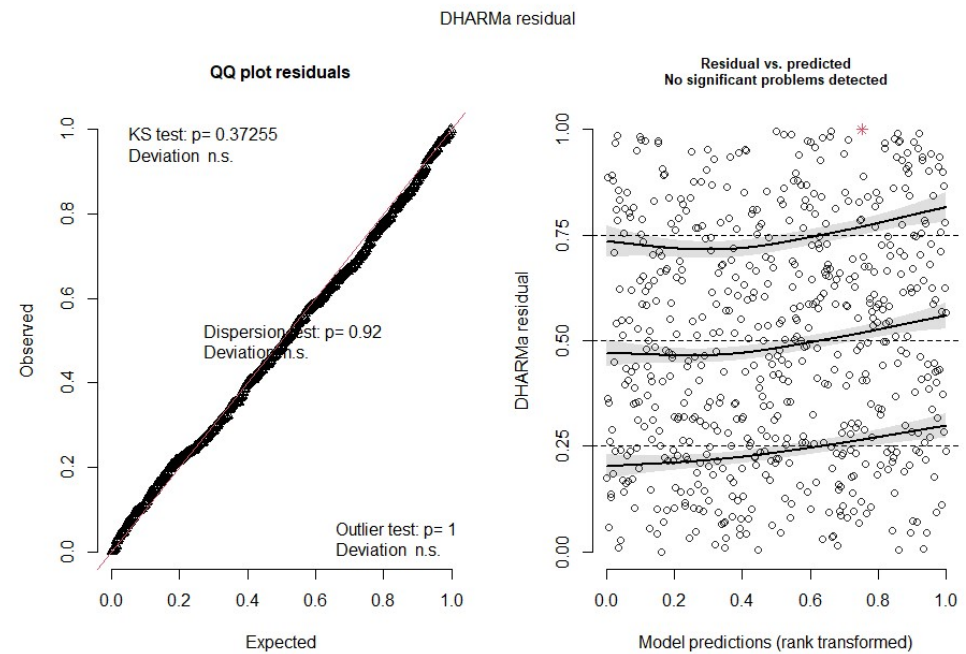

# 2017 TMB te(easting,northing)

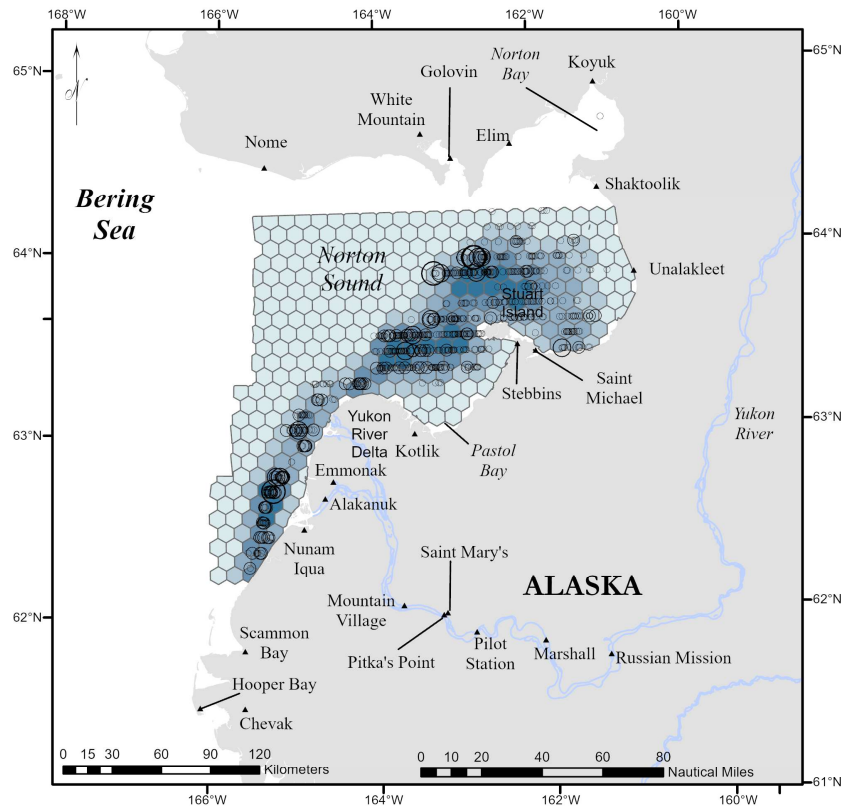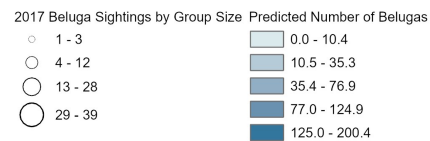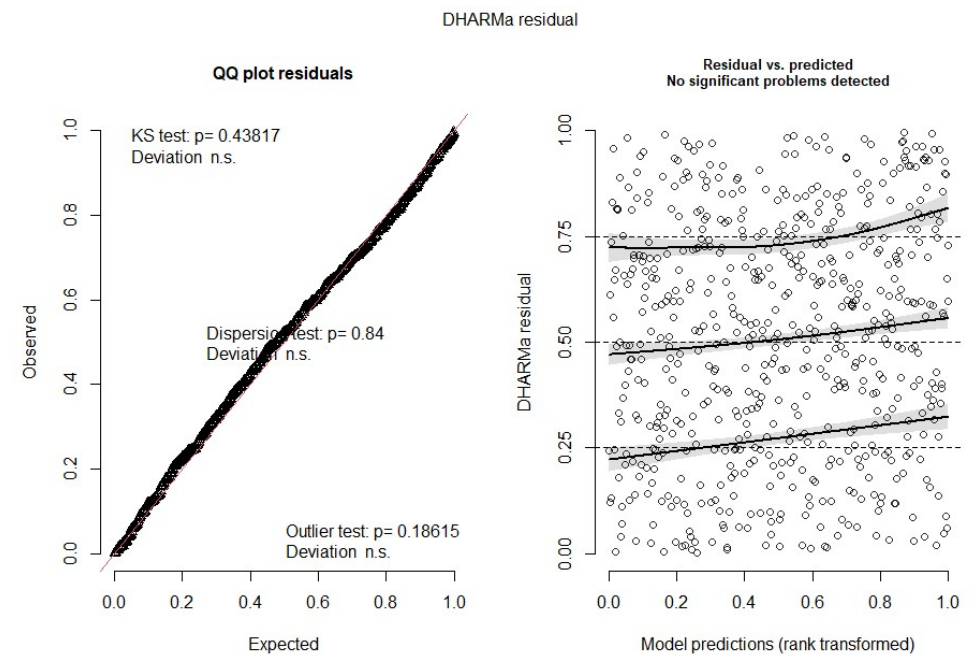



# 2017 TMB s(easting,northing,bs="ts")

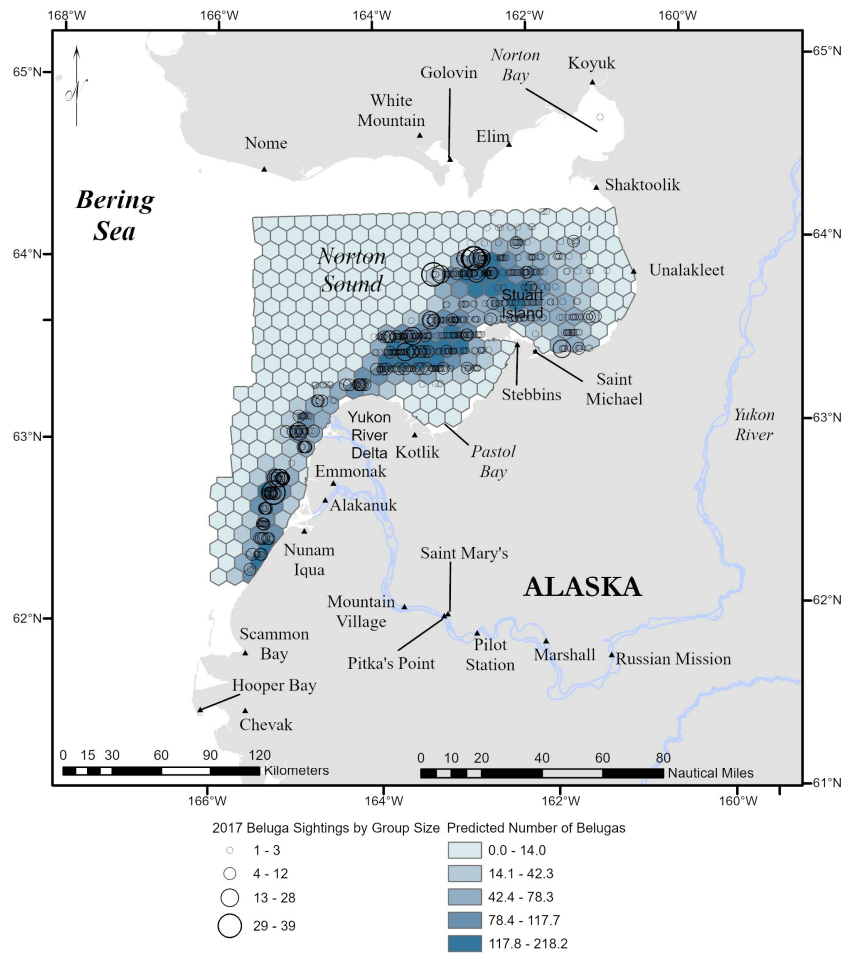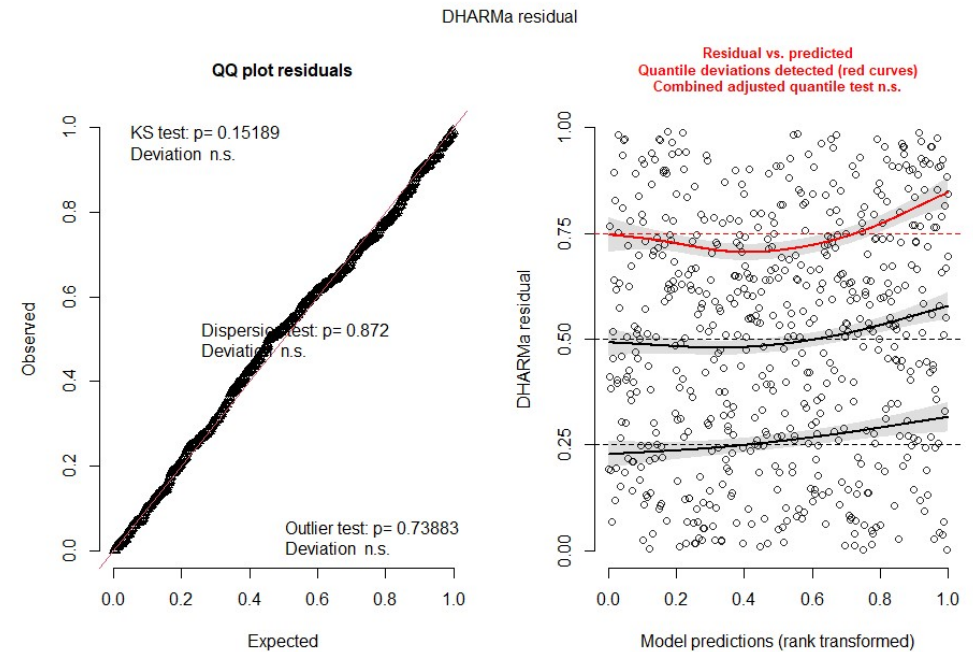

2022 candidate models in  
ensemble

# 2022 TMB SPDE no Scammon mesh5 (max.edge = 60 km)

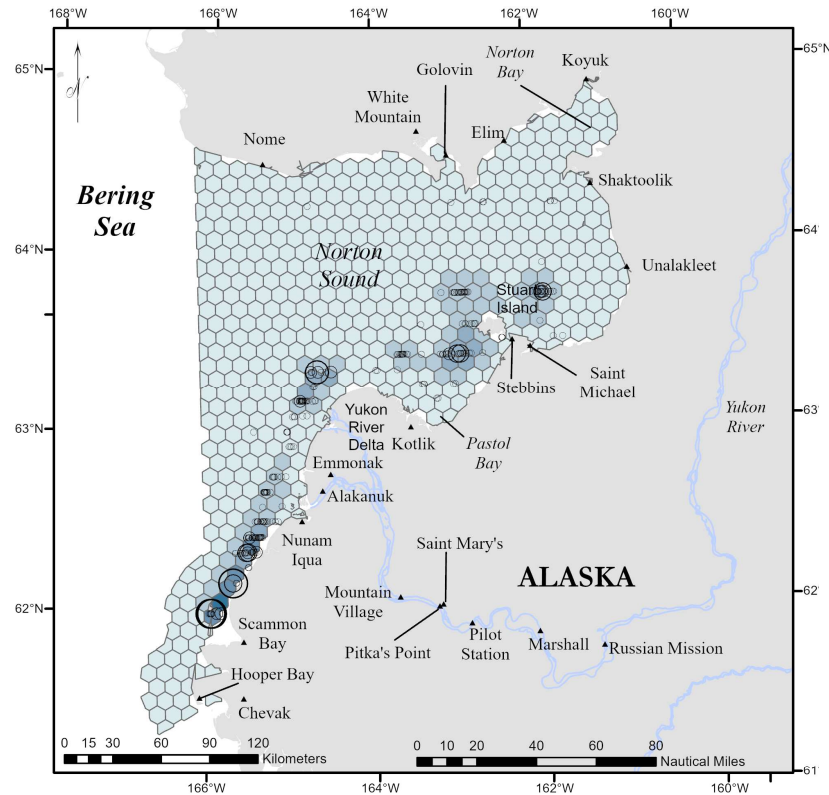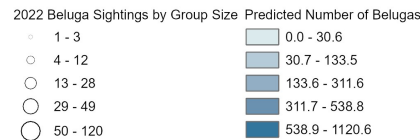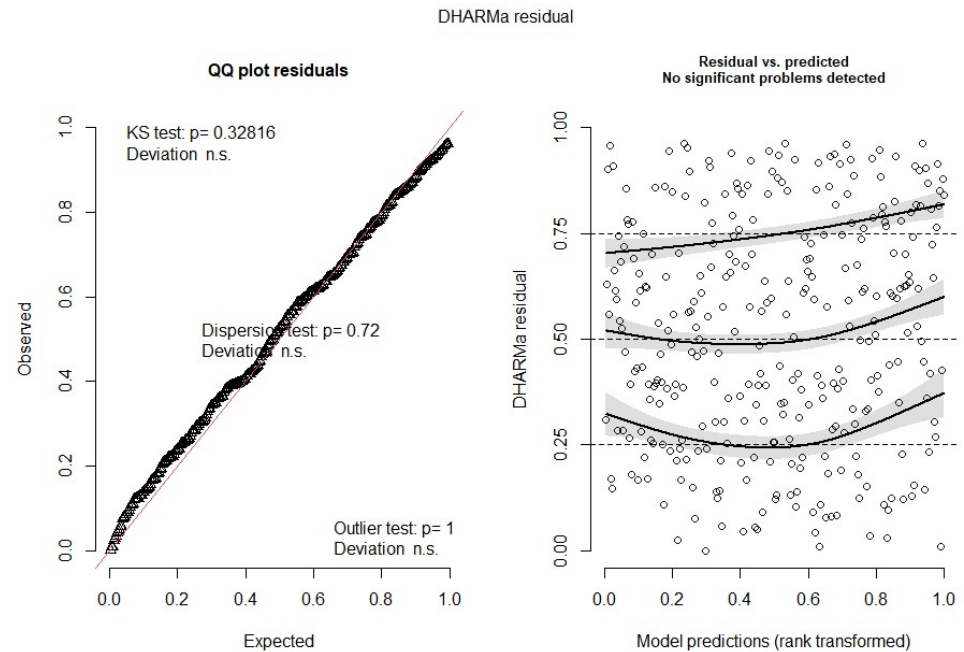

# 2022 TMB SPDE w/barriers no Scammon mesh2 (max.edge = 60 km)

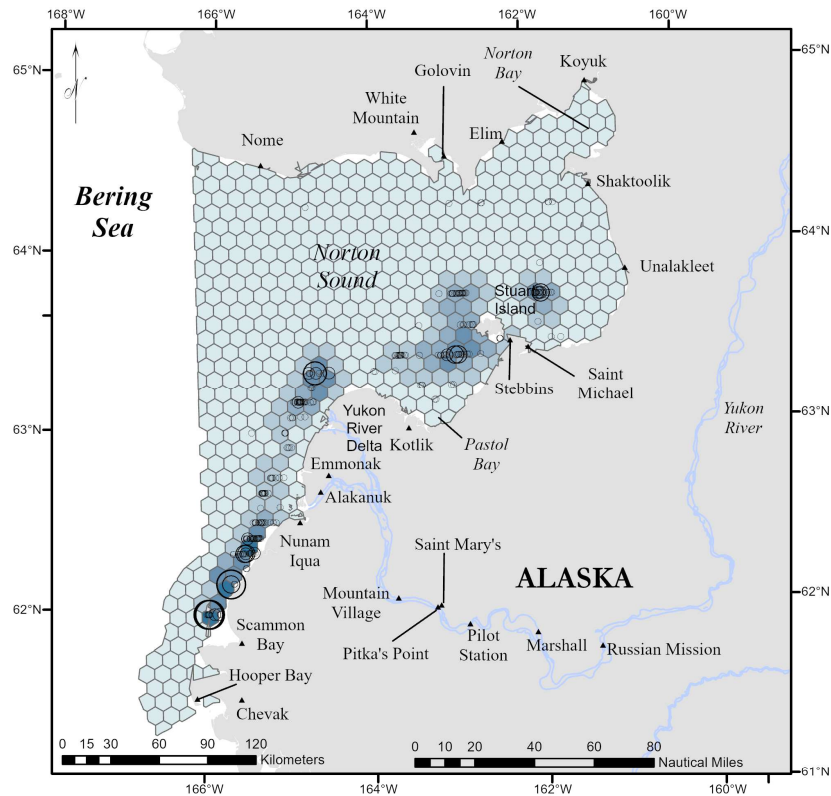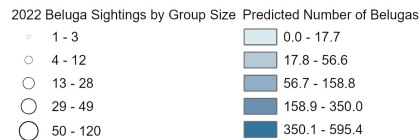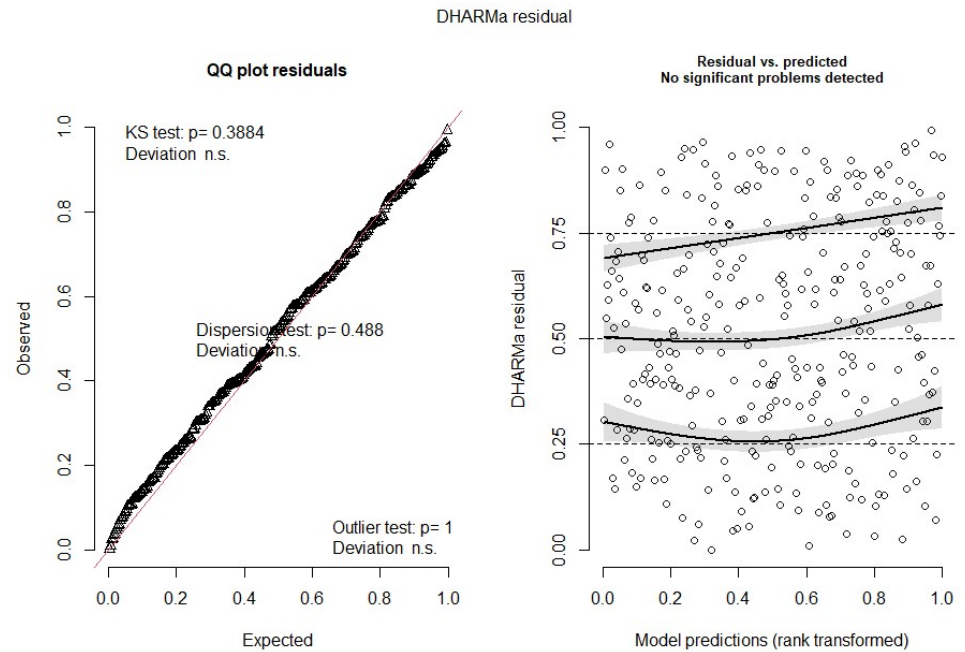

# 2022 TMB soap(easting,northing)

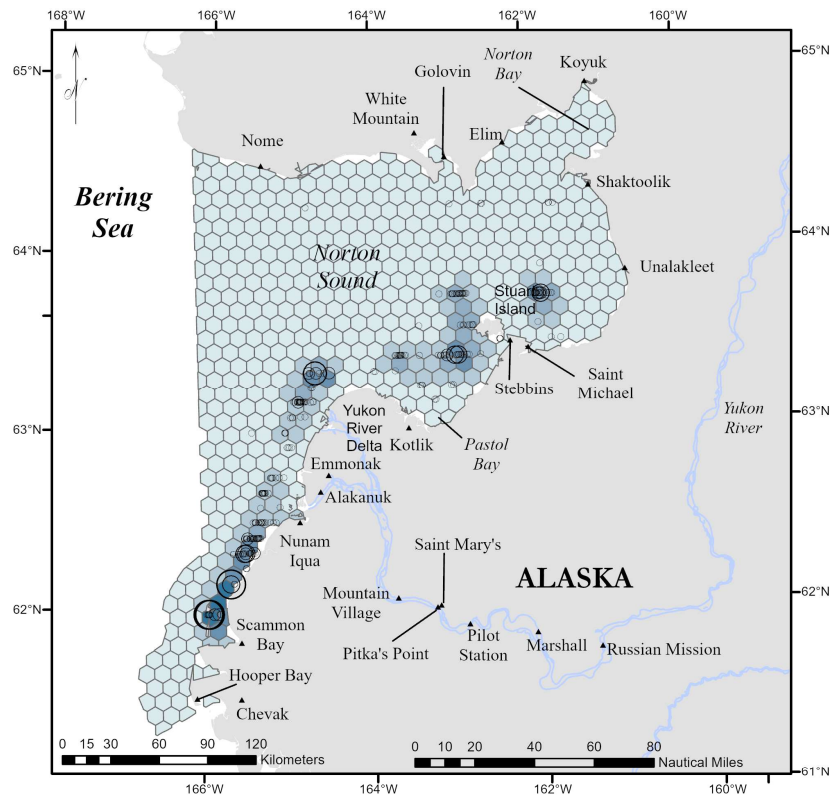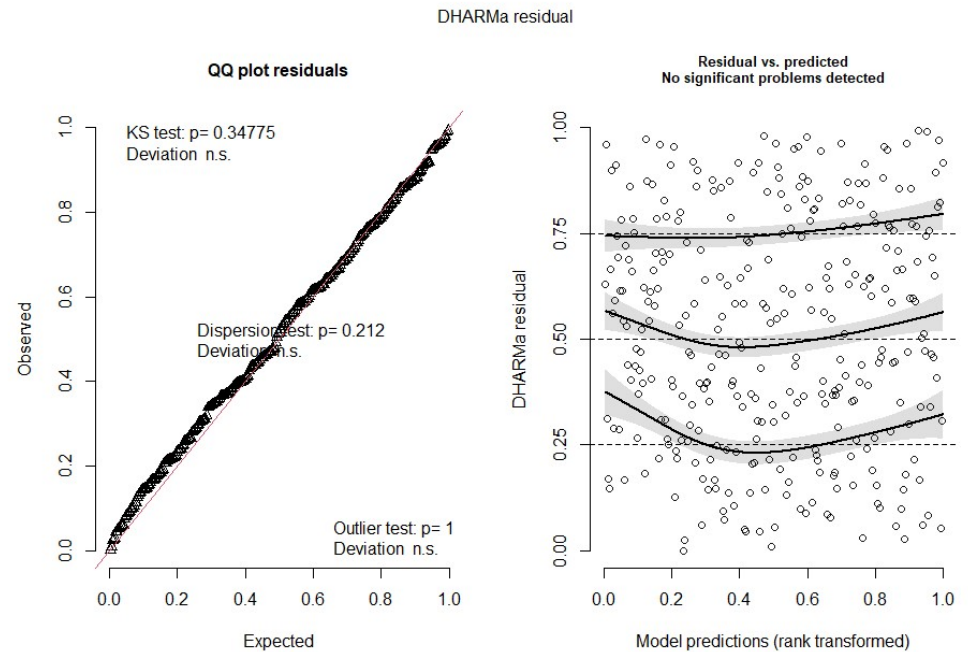

Supplement: EBS_Beluga_1722DSM_PeerJ_S6_DSM_Eval_v4.pdf [file EBS_Beluga_1722DSM_PeerJ_S6_DSM_Eval_v4.pdf]
