# Supplementary material for: Spatially explicit models of density improve estimates of Eastern Bering Sea beluga (Delphinapterus leucas) abundance and distribution from line-transect surveys
Source: PeerJ journal article supplement (doi:10.7717/peerj.20077), 2025-09-30
Supplement: NSDL1722_S1_Glossary_20250715.pdf [file NSDL1722_S1_Glossary_20250715.pdf]

## Supplement 1

### Glossary of Notation and Abbreviations

- $a$  : area searched during line-transect survey, where  $a = 2Lw$ ,  $L$  is the total length of transects surveyed, and  $w$  is the width of the strip searched on one side of the aircraft
- $\mathbf{a}$  : vector of the area surveyed for each transect segment ( $a_i = 2L_iw$ )
- $A$  : total study area size
- $\mathbf{A}$  : an  $(n_i, n_\eta)$  interpolation matrix used to convert raw random effects into transect-specific values. For SPDE models, this is constructed with a Delauney triangulation. For basis-penalty smooth models,  $\mathbf{A}$  is simply the design matrix associated with spatial smooth parameters.
- $\mathbf{A}^{pred}$  : an  $(n_h, n_\eta)$  interpolation matrix used to convert raw random effects into grid-cell specific predictions. For SPDE models, this is constructed with a Delauney triangulation. For spline-based smoother models,  $\mathbf{A}$  is a design matrix associated with locations of grid cell centroids (obtained using the “predict” function in `mgcv`).
- $\mathbf{c}$  : vector of observed counts of individual animals
- $c_i$  : observed number of individual animals on transect segment  $i$
- $[\mathbf{c}|\xi, \boldsymbol{\eta}, \mathbf{x}]$  : conditional probability density function of observed counts, given parameters, random effects, and known covariates
- CV : coefficient of variation
- $\hat{D}$  : estimate of density of animals (number of animals per unit area)
- DSM : density surface model
- EBS belugas : Eastern Bering Sea belugas
- $g(y_j, \mathbf{z}_j; \hat{\boldsymbol{\theta}}_g)$  : probability of detecting an animal at distance  $y_j$ , given that it is available to be seen and is associated with covariates  $\mathbf{z}_j$ , assuming perfect detection on the transect
- $h$  : grid cell index
- $i$  : segment index
- $j$  : group index
- $k$  : bootstrap replicate index
- $L$  : transect length
- $n_g$  : number of groups detected
- $n_i$  : number of transect segments in DSM
- $n_h$  : number of grid cells in DSM
- $n_\eta$  : number of random effects in DSM
- $\hat{N}$  : estimate of the total number of animals in the study area
- $\hat{p}(\mathbf{z}_j; \hat{\boldsymbol{\theta}})$  : model-based estimate of the overall probability that an observer detects a group of whales, given covariates  $\mathbf{z}_j$  that affect detectability. This term accounts for all sources of perception and availability bias (Marsh and Sinclair 1989; S4).

$\hat{p}_g(\mathbf{z}_j; \hat{\boldsymbol{\theta}}_g)$  : average probability that an observer detects an object that is available to be seen in the area searched, given covariates  $\mathbf{z}_j$  that affect detectability, assuming transect detection probability is 1.0  
 $\mathbf{p}_g$  : vector of  $\hat{p}_g(\mathbf{z}_j; \hat{\boldsymbol{\theta}}_g)$  for a collection of sightings indexed by  $j$   
 $p_i$  : shorthand for  $\hat{p}(\mathbf{z}_i; \hat{\boldsymbol{\theta}})$  for transects. Note that making the change from group-level detection probability (subscript  $j$ ) to transect-level detect probability (subscript  $i$ ) requires that we omit group-specific covariates, such as group size.  
 $\mathbf{p}_i$  : vector of the overall detection probability (including both availability and perception bias corrections) for each segment,  $p_i$ .  
 $p_j$  : shorthand for  $\hat{p}(\mathbf{z}_j; \hat{\boldsymbol{\theta}})$  for groups  
 $p^*(y_j, \mathbf{z}_j; \hat{\boldsymbol{\theta}})$  : probability of detecting an animal at distance  $y_j$ , given that it is associated with covariates  $\mathbf{z}_j$   
 $\hat{p}_A$  : estimate of availability probability, defined as the probability that a group is at the surface within an observer's field of view  
 $\hat{p}_{MR}(0, \mathbf{z}_j; \hat{\boldsymbol{\theta}}_{MR})$  : estimate of transect detection probability, defined as the probability of detecting an animal on the transect (or left-truncation point, if applicable)  
 $\mathbf{s}$  : vector of knot locations for SPDE models  
 $S_j$  : size of group indexed by  $j$   
 SPDE : stochastic partial differential equation  
 $\mathbf{Q}$  : precision (inverse covariance) matrix for random effects  
 Var : variance  
 $w$  : distance (width) searched on one side of the transect  
 $\mathbf{x}$  : vector of known covariates used in the DSM  
 $y_j$  : perpendicular distance from the transect line to the sighting of group  $j$   
 $\mathbf{z}_i$  : covariates that affect detectability on segment  $i$   
 $\mathbf{z}_j$  : covariates that affect detectability of group  $j$   
 $\beta_0$  : DSM intercept parameter  
 $\boldsymbol{\delta}$  : vector of 'realized' random effects for transect counts  
 $\boldsymbol{\eta}$  : vector of random effects for the DSM  
 $[\boldsymbol{\eta}|\mathbf{x}, \boldsymbol{\xi}]$  : probability density function of random effects for the DSM  
 $\hat{\boldsymbol{\theta}}$  : parameter estimates required to estimate detection probabilities  
 $\mu$  : mean of a Tweedie probability density function  
 $\mu_i$  : expected number of whales encountered on transect segment  $i$   
 $\boldsymbol{\xi}$  : vector of unknown parameters for the DSM  
 $\rho$  : power parameter for the Tweedie probability density function  
 $\phi$  : dispersion parameter for the Tweedie probability density function  
 $\tau$  : Matérn precision parameter  
 $\kappa$  : Matérn inverse range parameter  
 $\lambda$  : penalization parameter(s) for basis-penalty smooths  
 $\lambda_{m,h}$  : predicted abundance from model  $m$  for unsampled location  $h$   
 $\lambda_{m,max}$  : maximum predicted abundance across all sampled cells
